# Supplementary material for: Combination Therapy with Fluoxetine and the Nucleoside Analog GS-441524 Exerts Synergistic Antiviral Effects against Different SARS-CoV-2 Variants In Vitro
Source: MDPI journal article supplement (doi:10.3390/pharmaceutics13091400), 2021-09-03
Supplement: s1 [file s1]

# Supplementary Material: Combination Therapy with Fluoxetine and the Nucleoside Analog GS-441524 Exerts Synergistic Antiviral Effects against Different SARS-CoV-2 Variants In Vitro

Linda Brunotte, Shuyu Zheng, Angeles Mecate-Zambrano, Jing Tang, Stephan Ludwig, Ursula Rescher and Sebastian Schloer

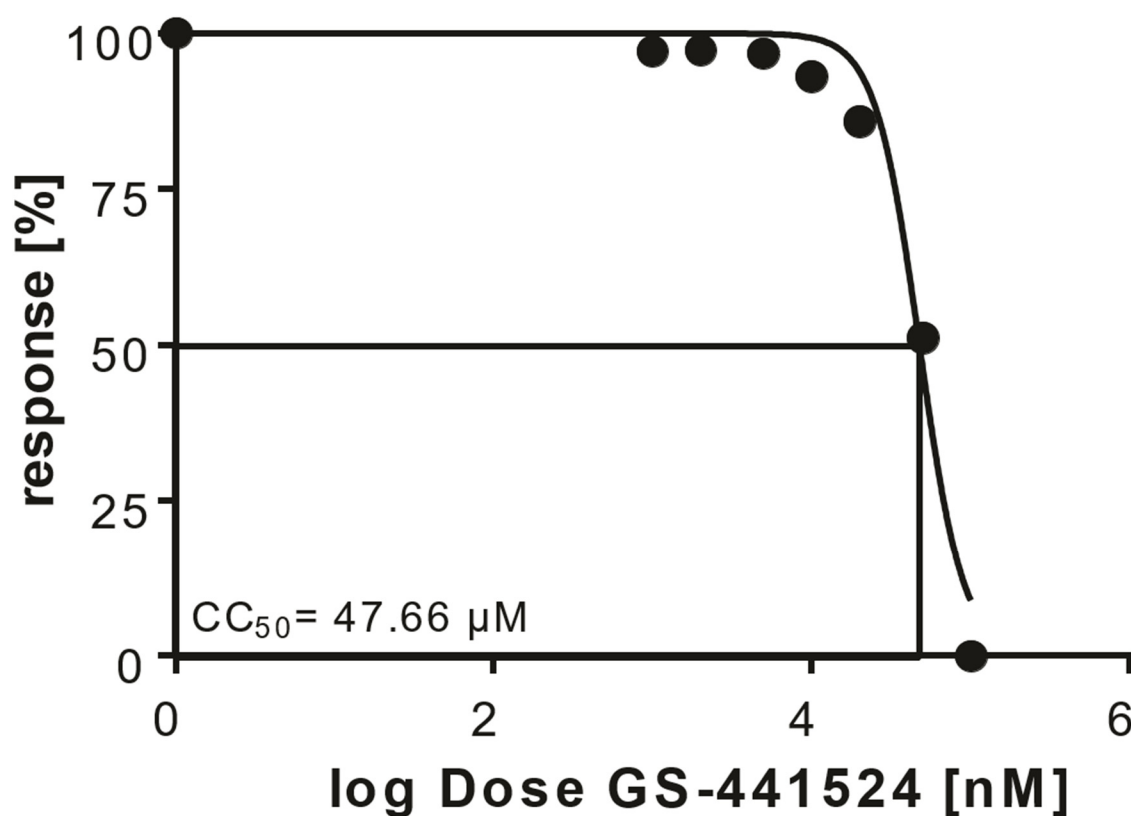

a

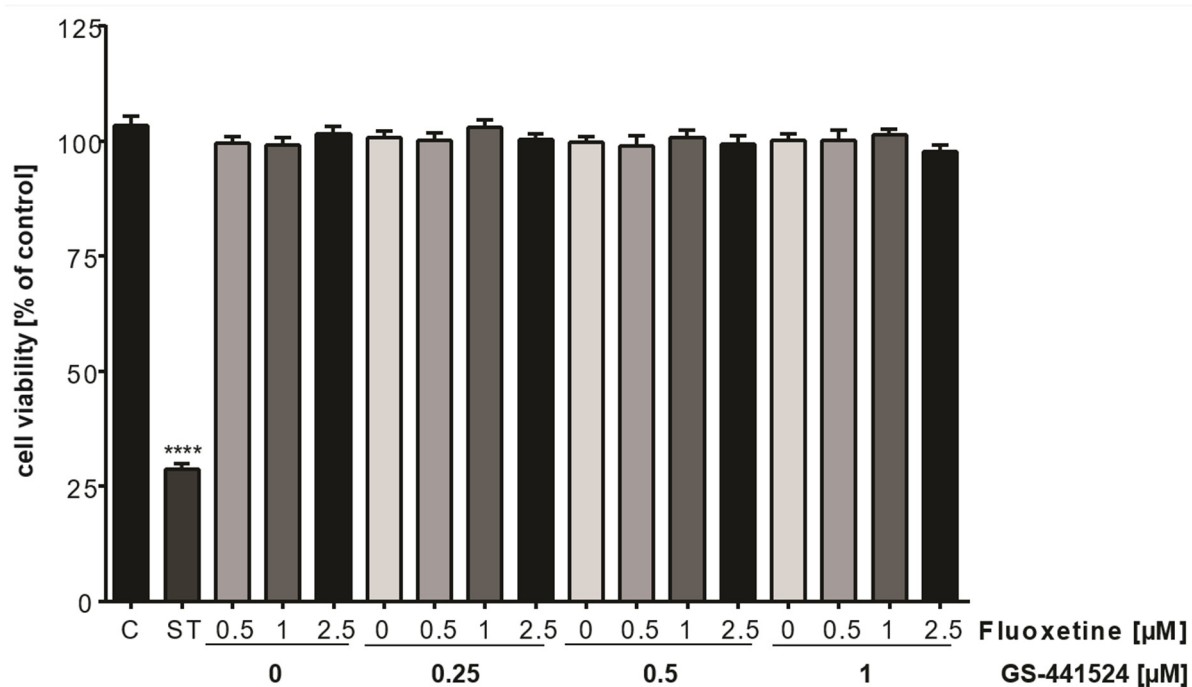

b

**Figure S1. Analysis of the cytotoxicity of GS-441524 monotherapy and of the combinatory treatment with fluoxetine.** (a) GS-441524 single treatment, (b) fluoxetine and GS-441524 combinatory treatment. Calu-3 cells were treated with the indicated drug combinations for 48 h. Bars display mean percentages of viable cells ± SEM, with mean viability in solvent-treated control cells (C) set to 100%. Staurosporine (ST)-induced cytotoxicity served as a positive control.  $n = 5$ , one-way ANOVA followed by Dunnett's multiple comparison test, \*\*\*\* $p < 0.0001$ .
